# Supplementary material for: Nanoscale-driven structural changes and associated superparamagnetism in magnetically diluted Ni–Zn ferrites
Source: Royal Society of Chemistry journal article supplement (doi:10.1039/c7qm00437k), 2017-11-27
Supplement: c7qm00437k1.pdf [file c7qm00437k1.pdf]

## Nanoscale driven structural changes and associated superparamagnetism in magnetically diluted Ni-Zn ferrites

Satu G. Gawas<sup>a</sup>, Sher Singh Meena<sup>b</sup>, Pramod Bhatt<sup>b</sup> and Vidhyadatta M. S. Verenkar<sup>a,†</sup>

### Supplementary Material

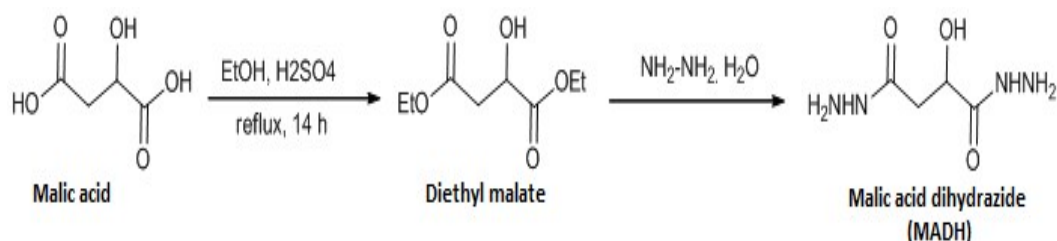

Scheme 1

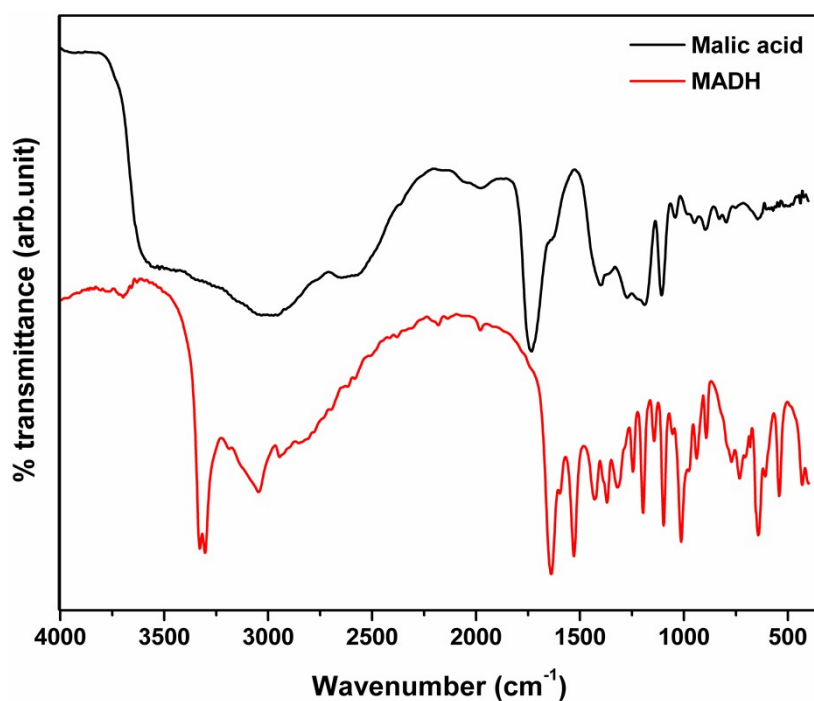

Fig. S2 FTIR spectra of Malic acid and Malic acid Dihydrazide

<sup>1</sup>H NMR of Malic acid dihydrazide: <sup>1</sup>H NMR (DMSO-d<sub>6</sub>, 400 MHz)  $\delta$  2.20 (dd, 1H, H-3,  $J$  = 9.6, 14.4Hz);  
 $\delta$  2.39 (dd, 1H, H-3,  $J$  = 3.6, 14.4Hz);  
 $\delta$  4.26 (br s, 4H, 2(N-NH<sub>2</sub>);  
 $\delta$  4.28 (t, 1H, H-2);  
 $\delta$  5.50 (d, 1H, OH, exchangeable with D<sub>2</sub>O);  
 $\delta$  8.92 (s, 1H, CONH);  
 $\delta$  8.97 (s, 1H, CONH).

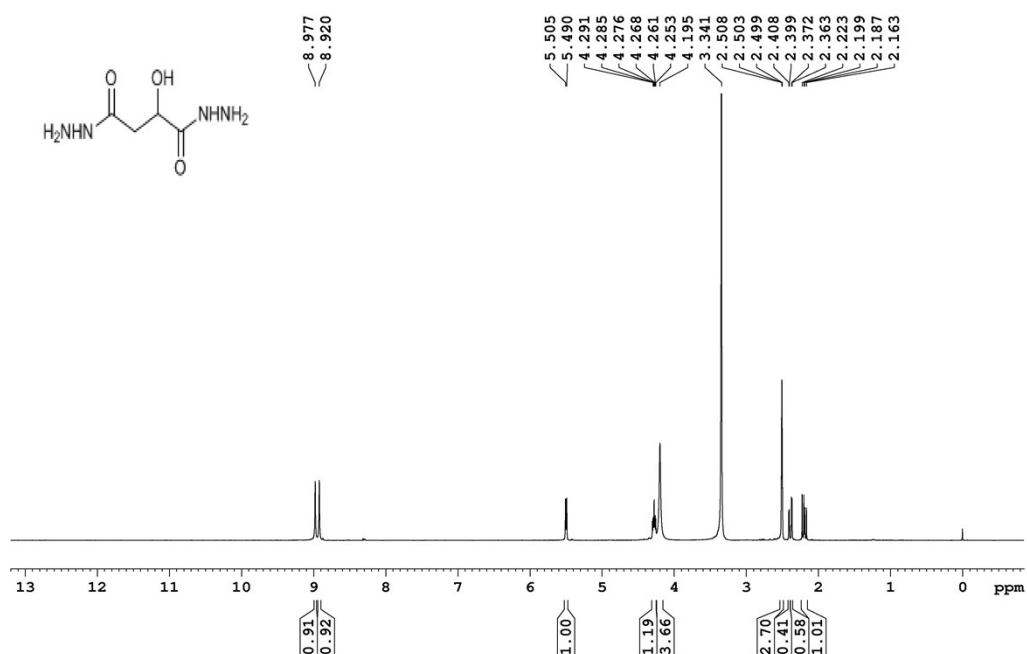Fig. S3  $^1\text{H}$  NMR spectra of Malic acid dihydrazide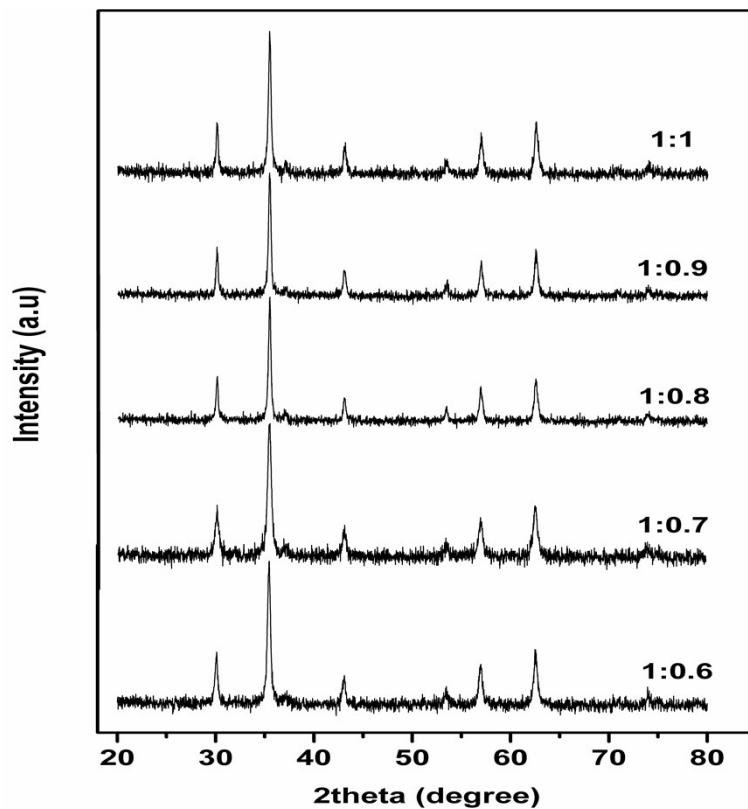

Fig. S4 XRD plots for Optimization of oxidizer to fuel ratio with variation in fuel fraction.
